# Supplementary material for: Infectious Chikungunya Virus in the Saliva of Mice, Monkeys and Humans
Source: PubMed Central journal article supplement (PMC4598147; doi:10.1371/journal.pone.0139481), 2015-10-08
Supplement: pone.0139481.s001.pdf [file pone.0139481.s001.pdf]

S1 File

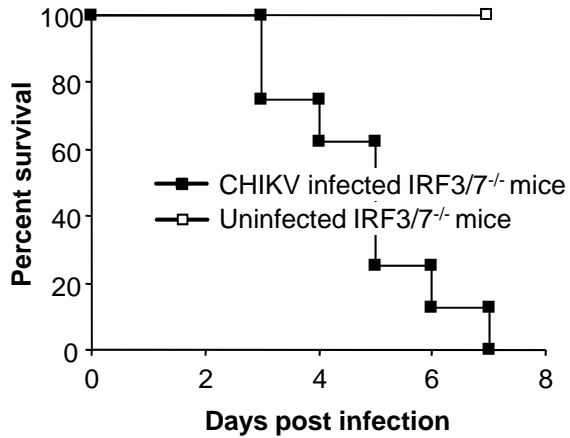

**Figure A (a)** Survival of IRF3/7<sup>-/-</sup> mice with and without i.p. inoculation of  $2 \times 10^4$  CCID<sub>50</sub> CHIKV. All infected mice showed clinical signs requiring euthanasia within 7 days (n=8). The survival curve is similar to that reported previously for IRF3/7<sup>-/-</sup> mice infected with the same dose via s.c. injection into the feet (Rudd et al., 2012).

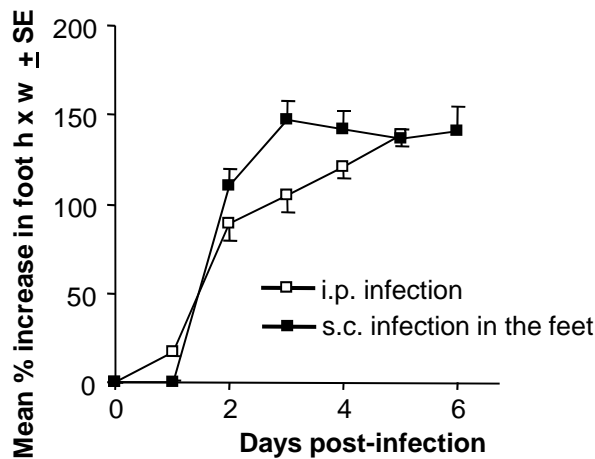

**Figure A (b)** Foot swelling in IRF3/7<sup>-/-</sup> mice infected via s.c. injection into the feet (Rudd et al., 2012) or via i.p. inoculation ( $2 \times 10^4$  CCID<sub>50</sub>). Both routes of infection result in significant overt foot swelling (n=3-7 mice per group and time point).

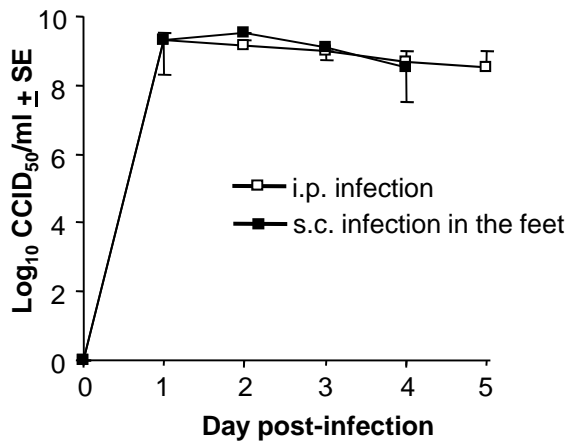

**Figure A (c)** Viraemia in IRF3/7<sup>-/-</sup> mice infected via s.c. injection into the feet (Rudd et al., 2012) or via i.p. inoculation ( $2 \times 10^4$  CCID<sub>50</sub>). Both routes of infection result similar viraemia levels (n=3-5 mice per group and time point).

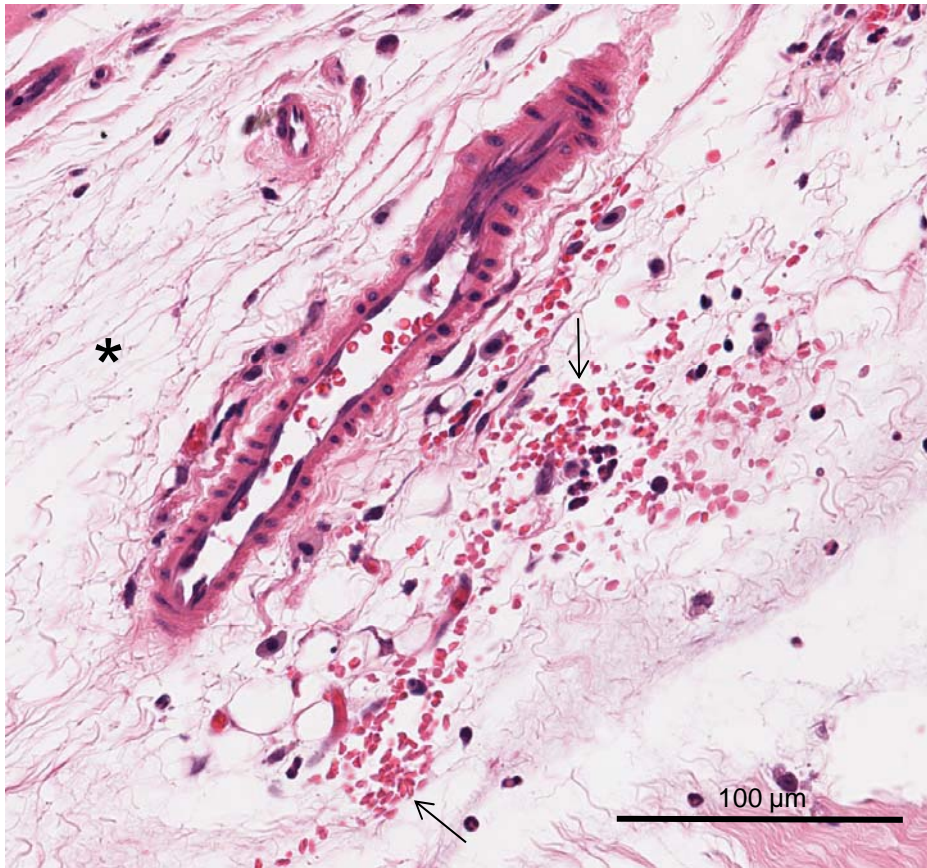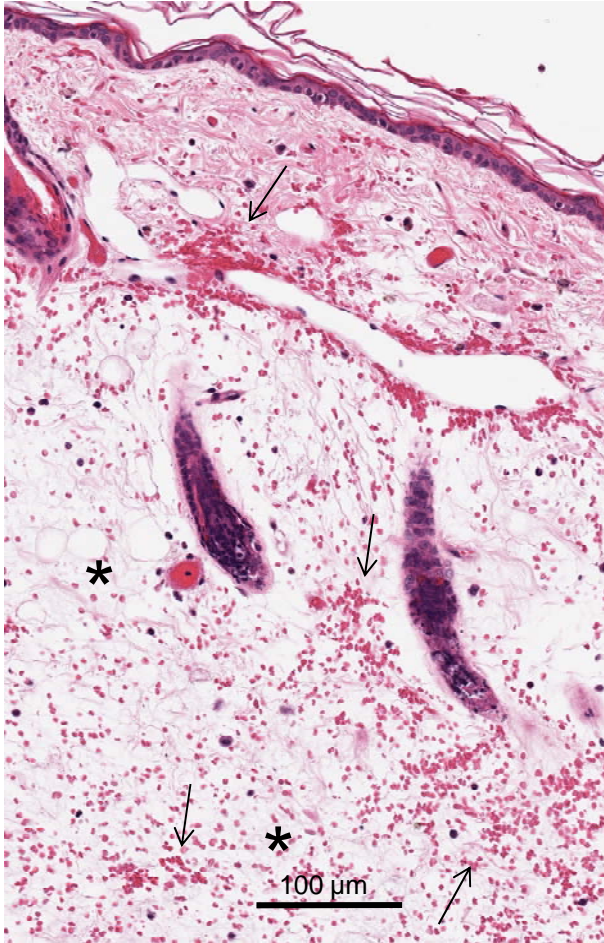

**Figure A (d)** H&E staining of foot sections of IRF3/7<sup>-/-</sup> mice day 5 after i.p. inoculation of  $2 \times 10^4$  CCID<sub>50</sub> CHIKV. Clear signs of haemorrhage (arrows) and edema (\*) were evident similar to that described after s.c. inoculation (Rudd et al. 2012).

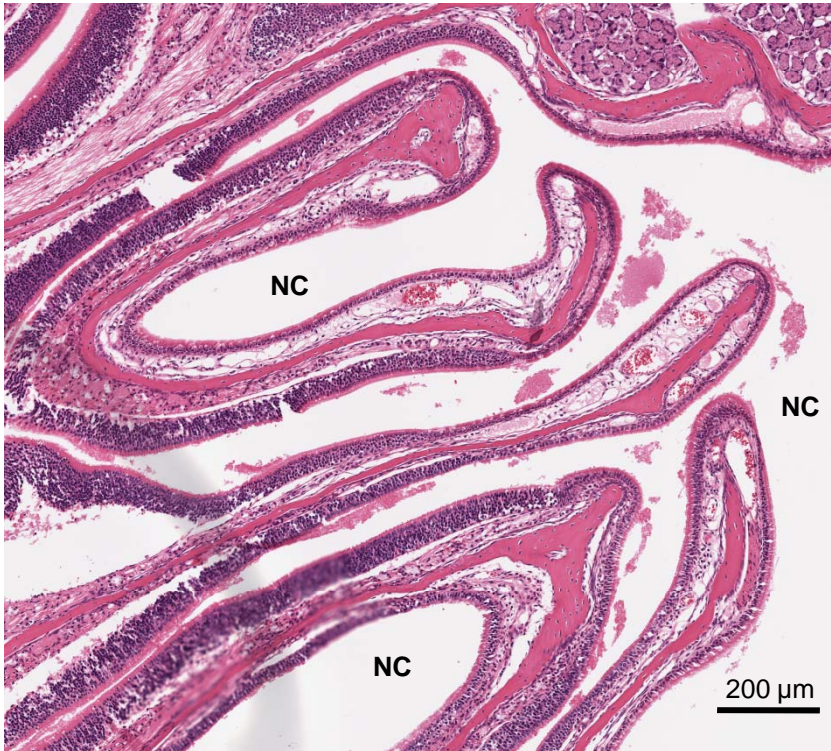

**Figure B.** H&E of head sections showing nasal cavities of C57BL/6 mice day 5 post i.p. inoculation of CHIKV ( $2 \times 10^4$  CCID<sub>50</sub>). No overt hemorrhagic epithelial lesions were found. Occasionally (2 instances in one mouse out of 3 examined) a small number of red blood cells were seen in the nasal cavity (bottom image, arrows). NC – nasal cavity.

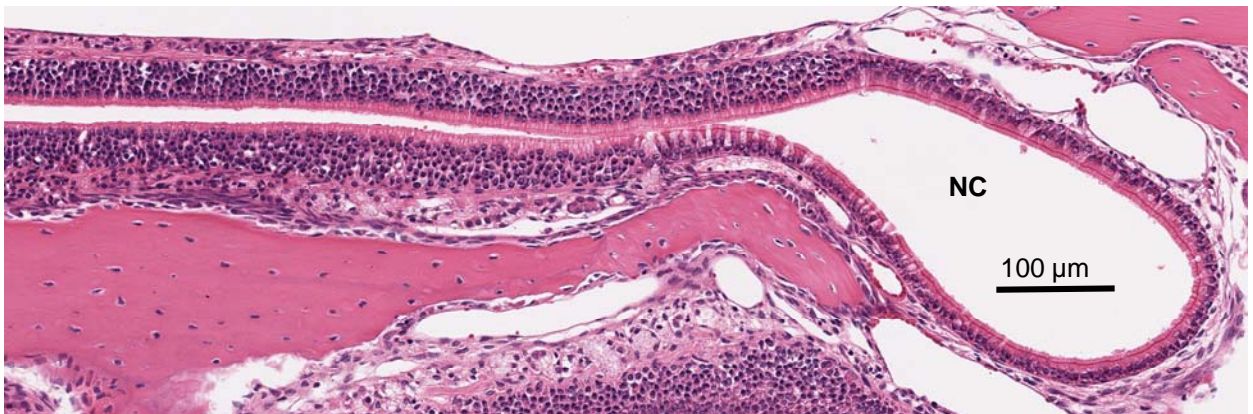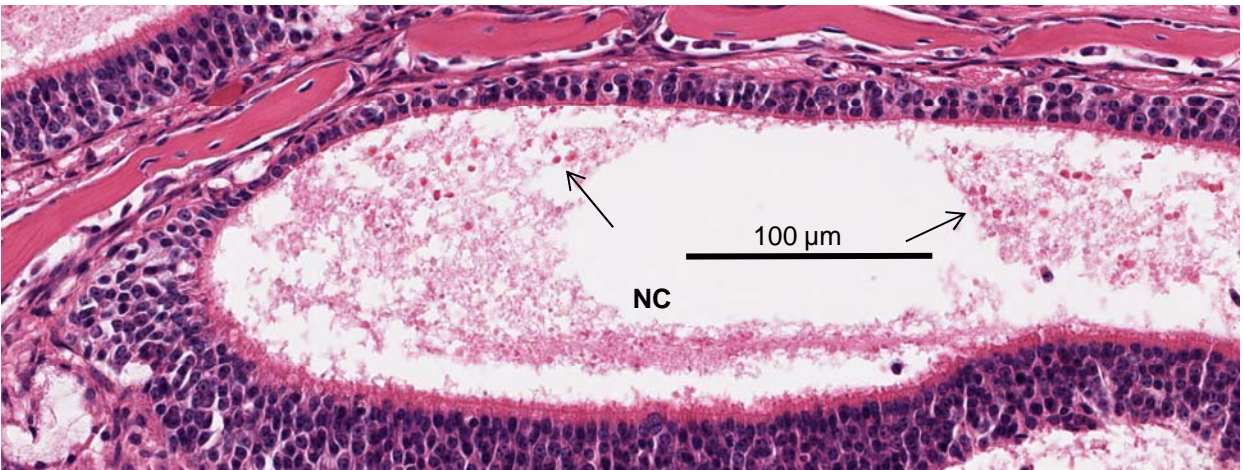

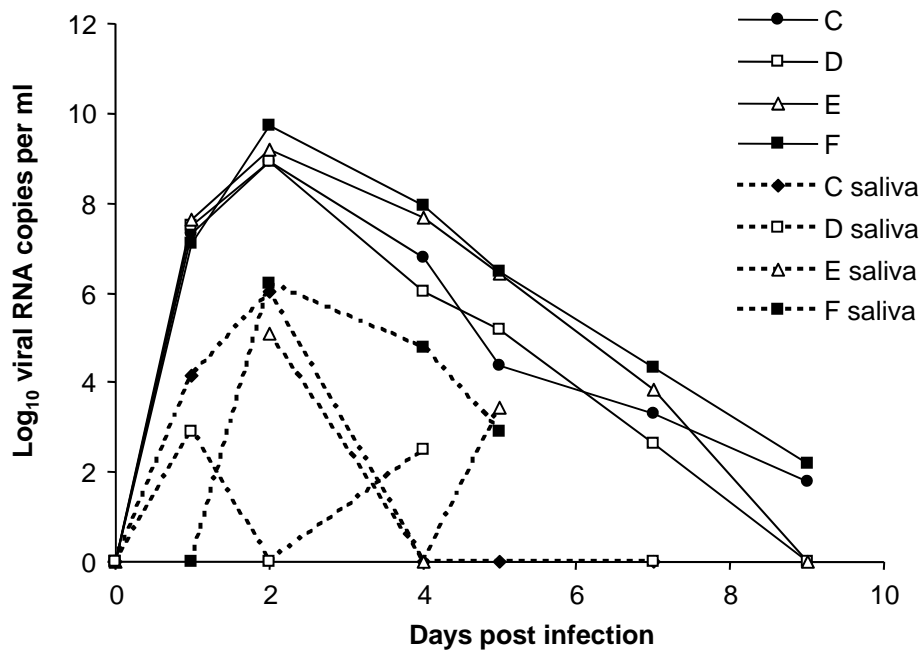

**Figure C.** Graphical representation of the viral RNA data provided in Table 3 for animals C to F.
